# Supplementary material
Source: PubMed Central journal article supplement (PMC8996503)
Supplement: NIHMS1794016-supplement-Supplementary_materials.pdf [file NIHMS1794016-supplement-Supplementary_materials.pdf]

# **Activation of autophagy attenuates motor deficits and extends lifespan in a *C. elegans* model of ALS**

Hui Xu <sup>a</sup>, Congcong Jia <sup>a</sup>, Cheng Cheng <sup>a</sup>, Haifeng Wu <sup>a</sup>, Huaibin Cai <sup>c</sup>, Weidong Le <sup>a, b, \*</sup>

<sup>a</sup> *Liaoning Provincial Key Laboratory for Research on the Pathogenic Mechanisms of Neurological Diseases, the First Affiliated Hospital, Dalian Medical University, Dalian 116021, China*

<sup>b</sup> *Institute of Neurology, Sichuan Academy of Medical Sciences-Sichuan Provincial People's Hospital, Chengdu 610072, China*

<sup>c</sup> *Transgenic Section, Laboratory of Neurogenetics, National Institute on Aging (NIA), National Institutes of Health, Bethesda, MD, United States*

\*Corresponding author: Prof. Weidong Le.

E-mail: [wdle@sibs.ac.cn](mailto:wdle@sibs.ac.cn).

Tel: +86-411-88135850.

Supplementary Materials:

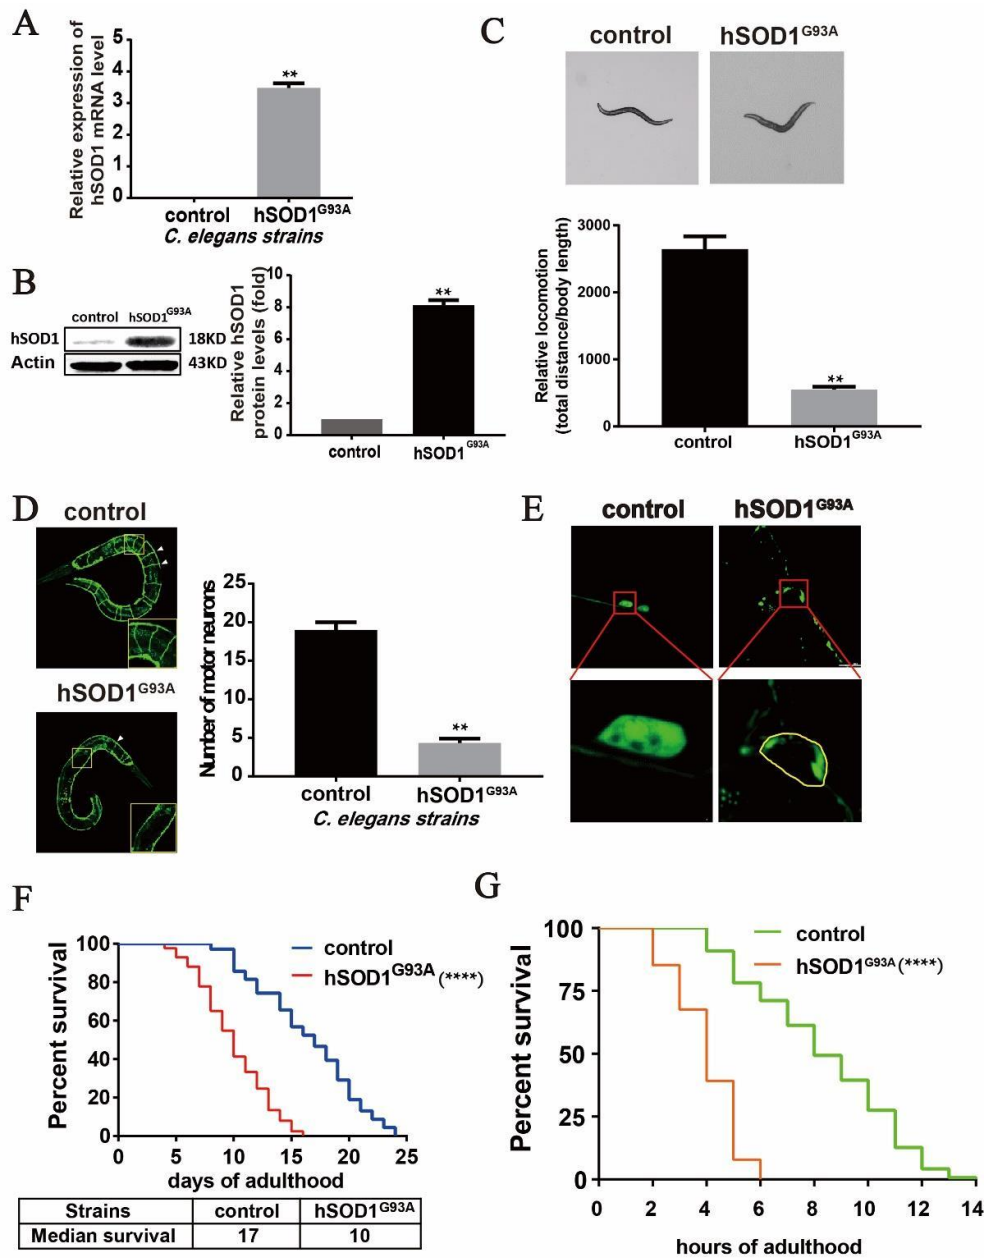

**Figure S1. hSOD1 mutation shortens lifespan, causes motor neuron loss, and diminishes the stress response in a *C. elegans* model of ALS.** (A) Relative expression of hSOD1 mRNA in hSOD1<sup>G93A</sup> worms. (B) Western blot analysis of hSOD1 protein level in the hSOD1 transgenic strains. hSOD1 expression was higher in hSOD1<sup>G93A</sup> worms than in controls. (C) Locomotor behavior in transgenic worms. The movement of hSOD1<sup>G93A</sup> worms was uncoordinated and relative locomotion was significantly reduced. (D, E) Survival and morphology of motor neurons in hSOD1 mutant worms. Motor neurons were almost completely broken down or absent in hSOD1<sup>G93A</sup> worms, indicating that hSOD1 mutation caused motor neuron degeneration. (F) Survival analysis. The median survival of hSOD1<sup>G93A</sup> worms was 10 days compared to 17 days

for control worms. (G) Oxidative stress response in transgenic worms. hSOD1 mutation shortened the lifespan of worms exposed to paraquat. \*\* $P < 0.001$ , \*\*\*\* $P < 0.0001$  ( $N \approx 100$  worms per condition from 3 independent experiments).

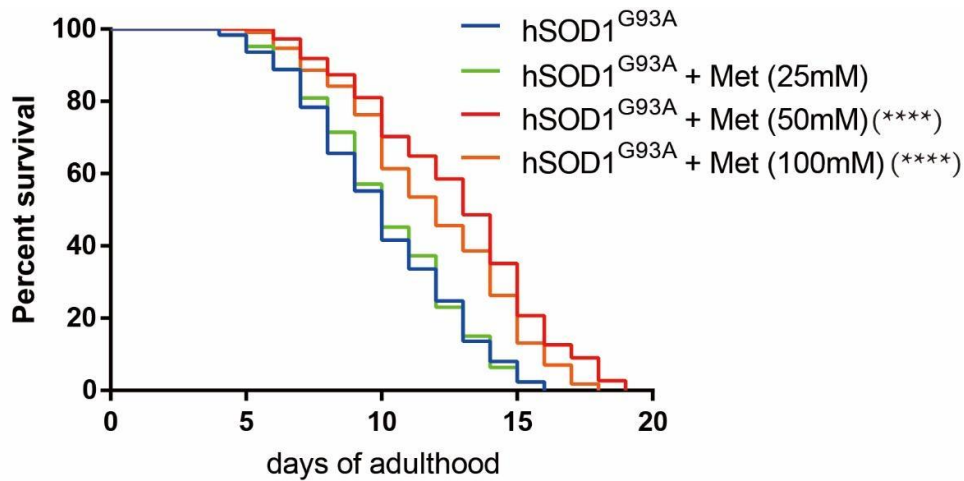

| Concentration   | control | 25mM | 50mM | 100mM |
|-----------------|---------|------|------|-------|
| Median survival | 10      | 10   | 13   | 12    |

**Figure S2. Determination of optimal metformin concentration.** Survival curves for hSOD1<sup>G93A</sup> worms treated with metformin at different concentrations of 25, 50, and 100 mM. Metformin at the concentrations of 50 mM significantly prolong the lifespan of hSOD1<sup>G93A</sup> worms. \*\*\*\* $P < 0.0001$ , ( $N \approx 100$  worms per condition from 3 independent experiments).
